# Supplementary material for: Refined structural studies on the fluorite-related polymorphs of sol–gel undoped and Eu3+-doped yttrium tantalates
Source: Royal Society of Chemistry journal article supplement (doi:10.1039/d4dt00338a), 2024-01-01
Supplement: d4dt00338a1.pdf [file d4dt00338a1.pdf]

**Supplementary information**

**Refined structural studies on the fluorite-related polymorphs of sol-gel undoped and Eu<sup>3+</sup>-doped yttrium tantalates**

Fernanda Hediger Borges<sup>a</sup>, Maria Vitória Guidorzi<sup>a</sup>, Hayra do Prado Labaki<sup>a</sup>, Rute A. S. Ferreira<sup>b</sup>, and Rogéria Rocha Gonçalves<sup>a\*</sup>.

<sup>a</sup> *Laboratório de Materiais Luminescentes Micro e Nanoestruturados –Mater Lumen,*

*Departamento de Química, FFCLRP, Universidade de São Paulo, SP, Brazil*

<sup>b</sup> *Department of Physics and CICECO-Aveiro Institute of Materials, University of Aveiro,*

*Aveiro, Portugal*

*\*rrgoncalves@ffclrp.usp.br*

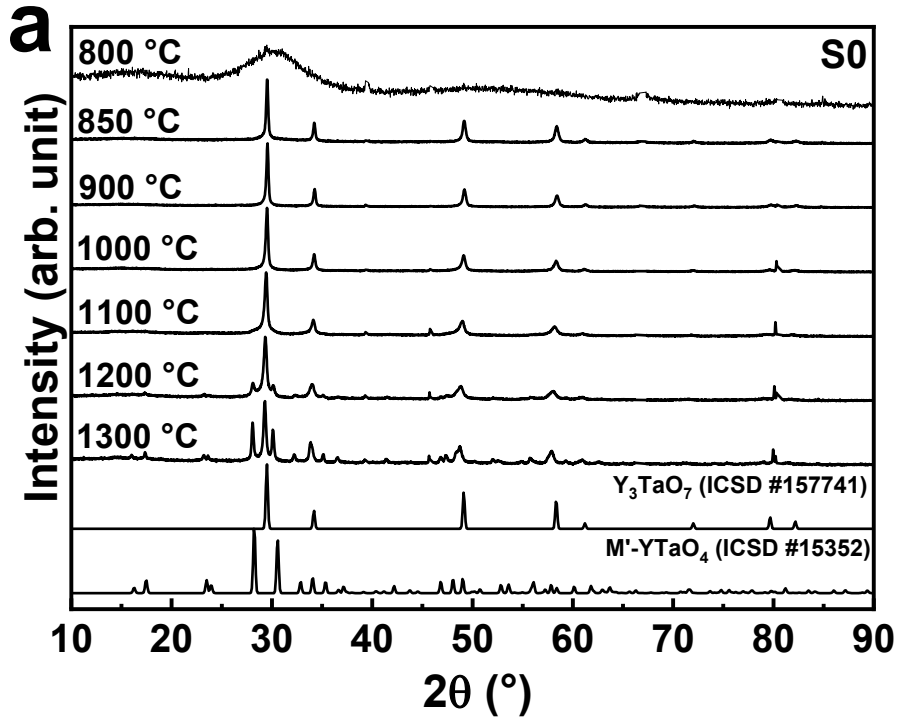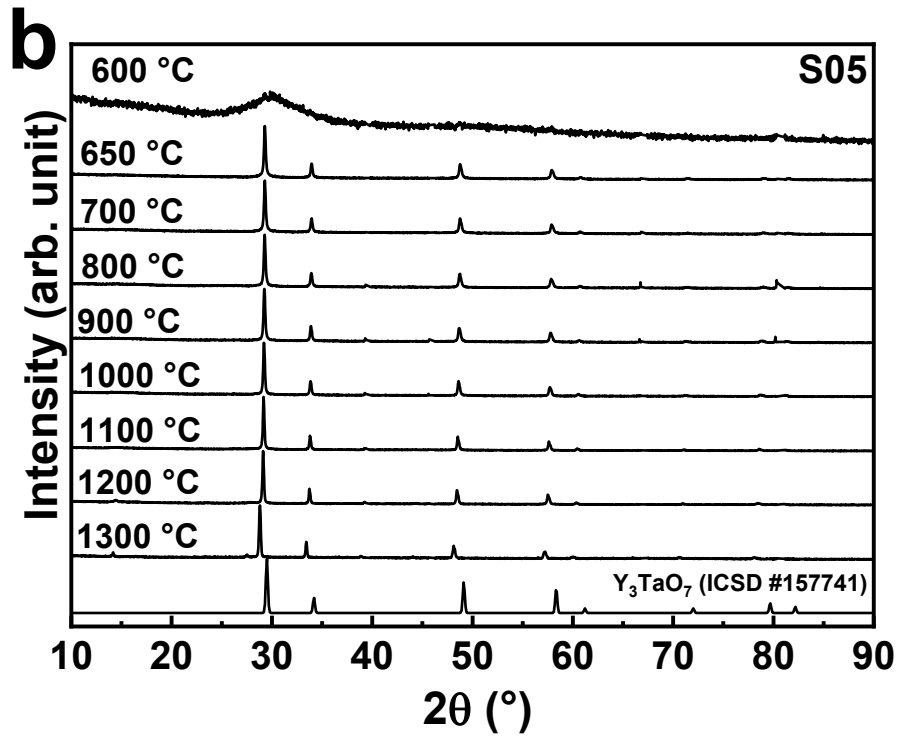

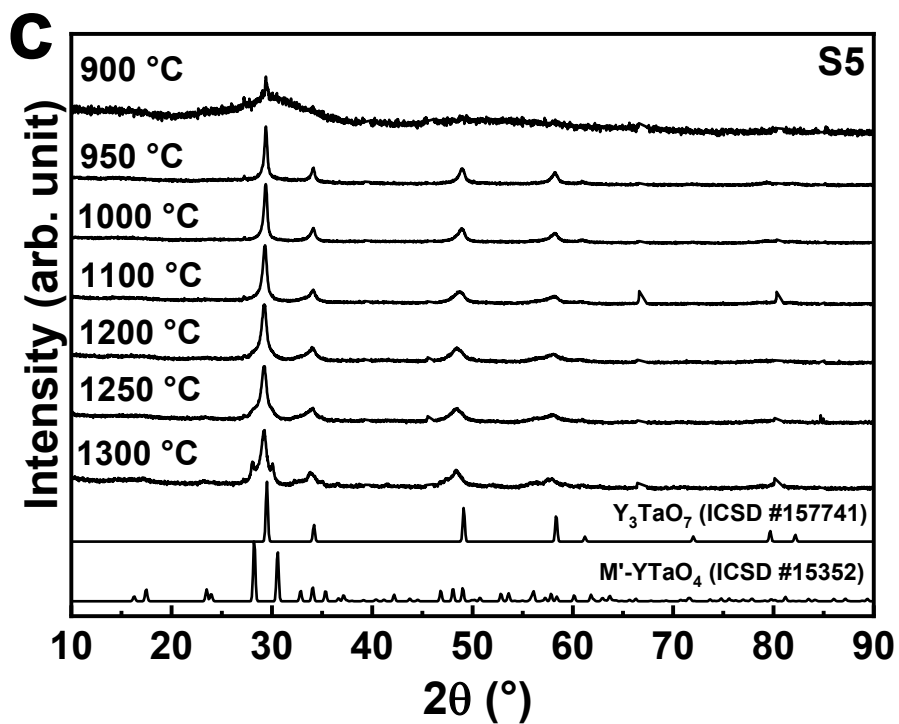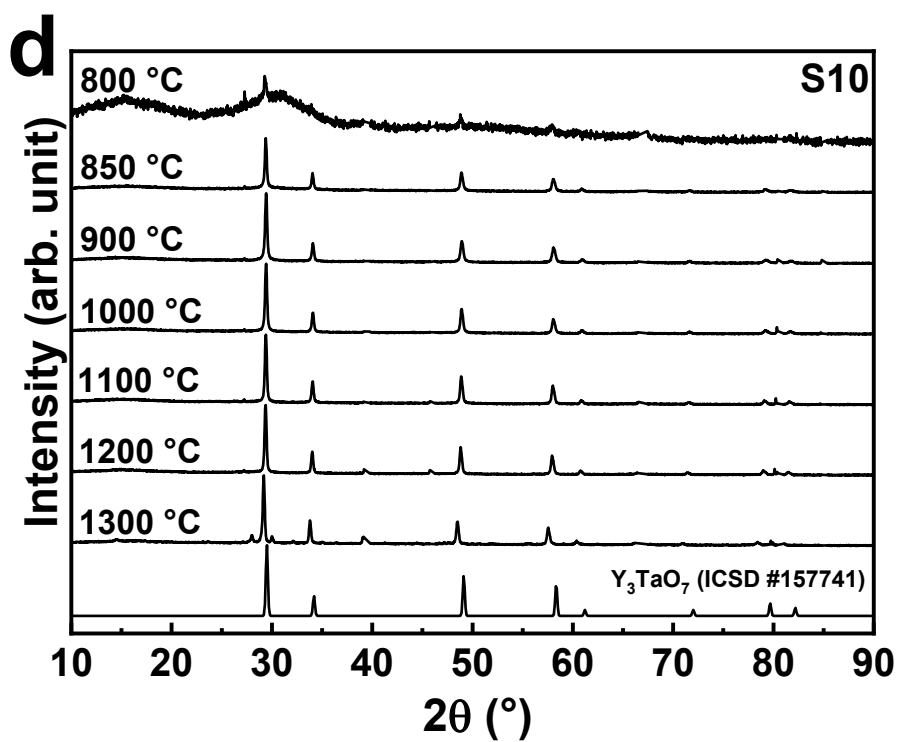

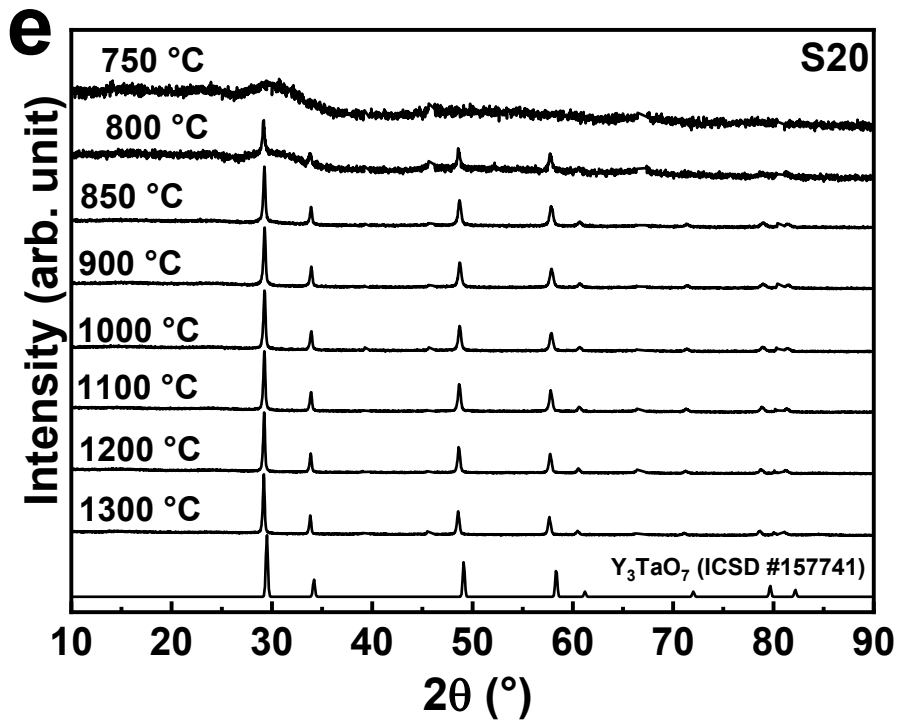

**Figure 1.** X-ray diffractograms of yttrium tantalate samples (S0, S05, S5, S10, and S20) annealed at different temperatures, as indicated.
